# Supplementary material
Source: PubMed Central journal article supplement (PMC6707059)
Supplement: jcsm.15.8.1089SD1.pdf [file jcsm.15.8.1089SD1.pdf]

## Supplemental Results

### Patient flow & drop-outs

One patient did not complete the baseline polysomnography (PSG) due to time constraints. Seventeen patients were lost to follow-up after the baseline PSG and did not complete the 3-month follow-up PSG. Seven subjects quit because of time constraints, two patients due to financial reasons, four patients did not show up at appointments several times despite regular reminders, two patients quit due to insufficient OSA reduction, one patient stopped its treatment due to OSA resolution by weight reduction and one patient moved abroad. No significant difference in baseline parameters were found between these patients and the patients who completed the 3-month follow-up (Table S1). BMI, arousal index and age values were normally distributed and thus tested using unpaired t-tests. All other parameters were tested using the Mann-Whitney U test.

### Effect of MAD treatment on clinical parameters

As described in the manuscript, 72 patients underwent the 3-month follow-up PSG. As shown in Table S2, these patients showed a significant change in AHI, min SaO<sub>2</sub>, ODI, BMI, visual analogue scale representing snoring, Epworth Sleepiness Scale score, apnoea index, hypopnea index and supine and non-supine AHI. No significant difference was shown for any other parameter.

Table S3 shows the difference in baseline parameters between responders and non-responders after 3 months of treatment. No significant difference in baseline parameters was present between both groups.

## Drug-induced sleep endoscopy

A Venn diagram visualising the percentage distribution of the visualized collapse sites is shown in Figure S1. Palatal collapse (94.2%) was the most prevalent in our dataset, followed by tongue base (52.1%), oropharyngeal (31.0%), hypopharyngeal (22.5%) and epiglottic (18.3%) collapse. 74.6% of all patients suffered from multilevel collapse.

Figure S2 represents the distribution for each collapse site. The amount of responders per category is shown in brackets. Only palatal collapse was present in all three directions (anteroposterior, laterolateral and concentric). Oropharyngeal and hypopharyngeal collapse were only present in laterolateral direction, while tongue base was only present in anteroposterior direction. Epiglottic collapse was only present in anteroposterior direction in all but one patient who showed concentric epiglottic collapse.

**Figure S1:** Venn diagram representing sites of collapse.

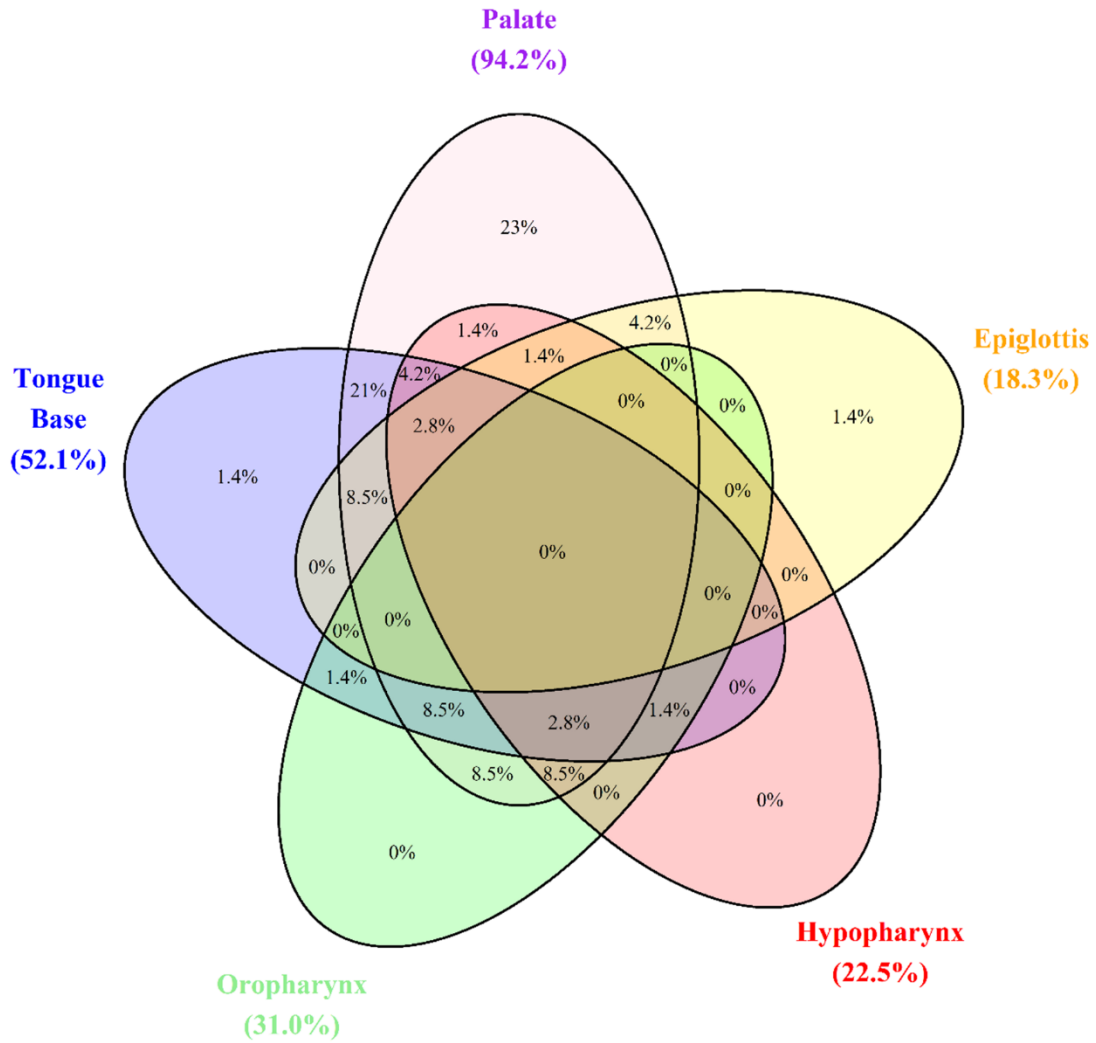

In

1 person, it was impossible to assess the upper airway collapse sites. 74.6% of the patients suffered from multilevel collapse. Most patients (94.2%) suffered from palatal collapse, followed by tongue base (52.1%), oropharyngeal (31.0%), hypopharyngeal (22.5%) and epiglottic (18.3%) collapse. 74.6% suffered from multilevel collapse. The amount of responders for each category is shown in brackets.

**Figure S2:** Distribution of complete and partial collapse and collapse direction for each collapse site.

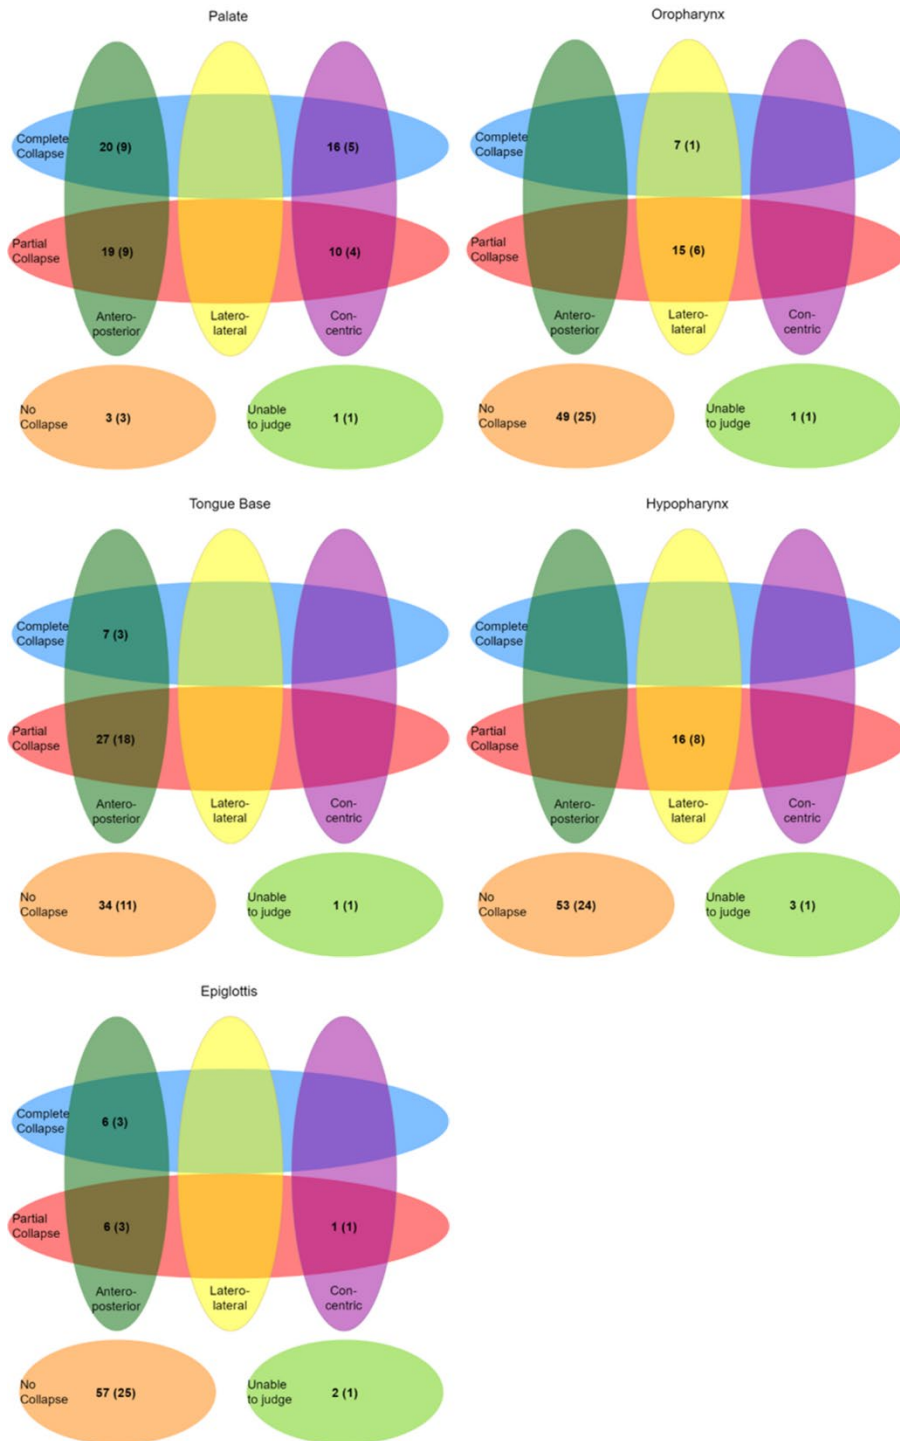

Amount of responders per category in brackets. Regarding palatal collapse, it was not possible to classify 3 patients (2 complete; 1 responder, 1 partial; 0 responders) into one of the three collapse directions as these patients showed 'doubtful CCCp'.

**Table S1:** Baseline characteristics drop-outs and patients continuing the protocol.

| Parameter                                      | Continued (n = 72)                | Drop-out after baseline PSG (n = 17) | p-value |
|------------------------------------------------|-----------------------------------|--------------------------------------|---------|
|                                                | Mean $\pm$ SD or Median (Q1 – Q3) | Mean $\pm$ SD or Median (Q1 – Q3)    |         |
| AHI (/h) <sup>1</sup>                          | 15.6 (10.5 – 23.4)                | 23.4 (11.2 – 24.8)                   | 0.2240  |
| VAS (0-10) <sup>1</sup>                        | 6.0 (5.0 – 9.0)                   | 8.5 (7.5 – 9.3)                      | 0.1160  |
| ESS (0-24) <sup>1</sup>                        | 7.0 (3.8 – 13.0)                  | 7.0 (3.8 – 13.0)                     | 0.5951  |
| Age (year) <sup>2</sup>                        | 48.3 $\pm$ 10.0                   | 46.9 $\pm$ 10.7                      | 0.6427  |
| BMI (kg/m <sup>2</sup> ) <sup>2</sup>          | 27.8 $\pm$ 3.3                    | 27.5 $\pm$ 3.6                       | 0.7961  |
| Sleep onset latency (min) <sup>1</sup>         | 13.9 (8.1 – 23.1)                 | 16.5 (8.0 – 31.7)                    | 0.8103  |
| Sleep Efficiency Index (%) <sup>1</sup>        | 88.2 (81.6 – 92.3)                | 88.0 (83.9 – 92.4)                   | 0.8306  |
| AI (/h) <sup>1</sup>                           | 1.4 (0.1 – 4.1)                   | 2.1 (0.8 – 4.2)                      | 0.2787  |
| HI (/h) <sup>1</sup>                           | 12.3 (8.7 – 18.8)                 | 18.8 (9.3 – 23.2)                    | 0.1683  |
| Ari (/h) <sup>2</sup>                          | 26.5 $\pm$ 13.8                   | 25.4 $\pm$ 12.2                      | 0.7419  |
| ODI (/h) <sup>1</sup>                          | 4.2 (2.3 – 11.2)                  | 5.2 (3.2 – 10.2)                     | 0.7741  |
| Mean SaO <sub>2</sub> (%) <sup>1</sup>         | 95.6 (94.1 – 96.1)                | 94.9 (94.3 – 96.1)                   | 0.7860  |
| Min SaO <sub>2</sub> (%) <sup>1</sup>          | 86.9 (83.6 – 90.0)                | 86.0 (84.0 – 88.1)                   | 0.4303  |
| Time SaO <sub>2</sub> < 90% (min) <sup>1</sup> | 0.5 (0.0 – 3.4)                   | 1.5 (0.2 – 7.8)                      | 0.1430  |
| AHI supine (/h) <sup>1</sup>                   | 35.3 (18.3 – 53.3)                | 41.1 (25.3 – 56.6)                   | 0.3369  |
| AHI non supine (/h) <sup>1</sup>               | 8.9 (4.4 – 16.1)                  | 12.5 (2.8 – 20.6)                    | 0.5981  |

No significance difference in baseline values was found between both groups. PSG: polysomnography, AHI: apnoea-hypopnea index, VAS: visual analogue snoring scale, ESS: Epworth Sleepiness Scale, BMI: body mass index, AI: apnoea index, HI: hypopnea index, Ari: arousal index, ODI: oxygen desaturation index. <sup>1</sup>:Median (Q1: quartile 1 – Q3: quartile 3) and Mann-Whitney U test, <sup>2</sup>: Mean  $\pm$  SD and unpaired t-test. Significant values (p < 0.05) in bold, nearly significant values (p < 0.1) in italics.

**Table S2:** Baseline and 3 month follow-up patient characteristics.

| Outcome parameter                              | COMPLETE DATASET (n = 72)                            |                                                            |                    |
|------------------------------------------------|------------------------------------------------------|------------------------------------------------------------|--------------------|
|                                                | Baseline PSG<br>Mean $\pm$ SD or<br>Median (Q1 – Q3) | Follow-up PSG (3M)<br>Mean $\pm$ SD or<br>Median (Q1 – Q3) | P-value            |
| AHI (/h) <sup>1</sup>                          | 15.6 (10.5 – 23.4)                                   | 9.0 (5.0 – 15.1)                                           | <b>&lt; 0.0001</b> |
| VAS (1-10) <sup>1</sup>                        | 6.0 (5.0 – 9.0)                                      | 6.0 (4.0 – 9.0)                                            | <b>0.0459</b>      |
| ESS (1-24) <sup>1</sup>                        | 7.0 (3.8 – 13.0)                                     | 6.0 (3.0 – 9.5)                                            | <b>&lt; 0.0001</b> |
| BMI (kg/m <sup>2</sup> ) <sup>2</sup>          | 27.8 $\pm$ 3.3                                       | 28.1 $\pm$ 3.3                                             | <b>0.0113</b>      |
| Sleep onset latency (min) <sup>1</sup>         | 13.9 (8.1 – 23.1)                                    | 13.2 (8.0 – 19.3)                                          | 0.2852             |
| Sleep Efficiency Index (%) <sup>1</sup>        | 88.2 (81.6 – 92.3)                                   | 88.1 (82.0 – 91.6)                                         | 0.3545             |
| AI (/h) <sup>1</sup>                           | 1.4 (0.1 – 4.1)                                      | 0.15 (0.0 – 1.2)                                           | <b>&lt; 0.0001</b> |
| HI (/h) <sup>1</sup>                           | 12.3 (8.7 – 18.8)                                    | 8.1 (4.0 – 12.9)                                           | <b>&lt; 0.0001</b> |
| Ari (/h) <sup>1</sup>                          | 23.6 (15.6 – 34.0)                                   | 23.1 (14.0 – 32.5)                                         | 0.4239             |
| ODI (/h) <sup>1</sup>                          | 4.2 (2.3 – 11.2)                                     | 2.0 (0.7 – 4.9)                                            | <b>&lt; 0.0001</b> |
| Mean SaO <sub>2</sub> (%) <sup>1</sup>         | 95.6 (94.1 – 96.1)                                   | 95.3 (94.3 – 95.9)                                         | 0.25               |
| Min SaO <sub>2</sub> (%) <sup>1</sup>          | 86.9 (83.6 – 90.0)                                   | 89.0 (86.0 – 91.0)                                         | <b>0.0020</b>      |
| Time SaO <sub>2</sub> < 90% (min) <sup>1</sup> | 0.5 (0.0 – 3.4)                                      | 0.2 (0.0 – 2.4)                                            | <i>0.0897</i>      |
| AHI supine (/h) <sup>1</sup>                   | 35.3 (18.3 – 53.3)                                   | 12.7 (4.1 – 30.2)                                          | <b>&lt; 0.0001</b> |
| AHI non supine (/h) <sup>1</sup>               | 8.9 (4.4 – 16.1)                                     | 5.0 (3.0 – 90.8)                                           | <b>0.0010</b>      |

AHI: apnoea-hypopnea index, ODI: oxygen desaturation index, BMI: body mass index, VAS: visual analogue snoring scale, ESS: Epworth Sleepiness Scale, AI: apnoea index, HI: hypopnea index, Ari: arousal index. <sup>1</sup>:Median (Q1: quartile 1 – Q3: quartile 3) and Wilcoxon signed rank test, <sup>2</sup>: Mean  $\pm$  SD and paired t-test. Significant values ( $p < 0.05$ ) in bold, nearly significant values ( $p < 0.1$ ) in italics.

**Table S3:** Baseline characteristics for responders and non-responders.

| Parameter                                      | COMPLETE DATASET (n = 72)                   |                                             |         |
|------------------------------------------------|---------------------------------------------|---------------------------------------------|---------|
|                                                | Responders                                  | Non-responders                              | P-value |
|                                                | Mean $\pm$ SD or Median (Q1 – Q3)<br>N = 33 | Mean $\pm$ SD or Median (Q1 – Q3)<br>N = 39 |         |
| AHI (/h) <sup>1</sup>                          | 17.3 (11.1 – 25.0)                          | 14.6 (10.5 – 22.6)                          | 0.5416  |
| VAS (1-10) <sup>1</sup>                        | 7.0 (6.0 – 9.0)                             | 6.0 (5.0 – 9.0)                             | 0.1806  |
| ESS (1-24) <sup>1</sup>                        | 7.0 (5.0 – 15.0)                            | 7.0 (4.0 – 11.0)                            | 0.3441  |
| Age (year) <sup>2</sup>                        | 48.2 $\pm$ 9.6                              | 48.4 $\pm$ 10.3                             | 0.9215  |
| BMI (kg/m <sup>2</sup> ) <sup>2</sup>          | 28.1 $\pm$ 3.0                              | 24.6 $\pm$ 3.5                              | 0.4958  |
| Sleep onset latency (min) <sup>1</sup>         | 11.1 (6.8 – 25.0)                           | 14.6 (10.4 – 21.7)                          | 0.2076  |
| Sleep Efficiency Index (%) <sup>1</sup>        | 88.4 (81.9 – 92.9)                          | 86.6 (81.2 – 92.2)                          | 0.6841  |
| AI (/h) <sup>1</sup>                           | 0.7 (0.1 – 3.4)                             | 1.4 (0.1 – 4.7)                             | 0.5288  |
| HI (/h) <sup>1</sup>                           | 14.1 (10.1 – 21.8)                          | 11.1 (8.4 – 17.3)                           | 0.1357  |
| Ari (/h) <sup>1</sup>                          | 29.5 (18.9 – 33.5)                          | 19.6 (13.8 – 35.6)                          | 0.1976  |
| ODI (/h) <sup>1</sup>                          | 4.0 (2.2 – 9.2)                             | 3.6 (1.7 – 7.3)                             | 0.7176  |
| Mean SaO <sub>2</sub> (%) <sup>1</sup>         | 94.9 (94.0 – 95.8)                          | 95.3 (94.3 – 96.0)                          | 0.3964  |
| Min SaO <sub>2</sub> (%) <sup>1</sup>          | 87.0 (82.5 – 90.0)                          | 89.0 (85.0 – 91.0)                          | 0.9152  |
| Time SaO <sub>2</sub> < 90% (min) <sup>1</sup> | 0.2 (0.0 – 6.0)                             | 0.8 (0.0 – 2.2)                             | 0.5724  |
| AHI supine (/h) <sup>1</sup>                   | 28.4 (17.6 – 40.7)                          | 39.0 (20.7 – 61.3)                          | 0.1201  |
| AHI non supine (/h) <sup>1</sup>               | 9.9 (4.6 – 17.7)                            | 8.9 (4.2 – 14.6)                            | 0.6350  |

No significant differences were present. AHI: apnoea-hypopnea index, ODI: oxygen desaturation index, BMI: body mass index, VAS: visual analogue snoring scale, ESS: Epworth Sleepiness Scale, AI: apnoea index, HI: hypopnea index, Ari: arousal index. <sup>1</sup>:Median (Q1: quartile 1 – Q3: quartile 3) and Mann-Whitney U test, <sup>2</sup>: Mean  $\pm$  SD and unpaired t-test.
